## Standards of Care in Diabetes—2025

- S1 Introduction and Methodology**  
Scope of the Guidelines  
Intended Audience  
Methodology and Procedure  
ADA Standards, Statements, Reports, and Reviews
- S6 Summary of Revisions**  
General Changes  
Section Changes
- S14 1. Improving Care and Promoting Health in Populations**  
Diabetes and Population Health  
Tailoring Treatment for Social Context  
Summary
- S27 2. Diagnosis and Classification of Diabetes**  
Diagnostic Tests for Diabetes  
Classification  
Type 1 Diabetes  
Prediabetes and Type 2 Diabetes  
Pancreatic Diabetes or Diabetes in the  
Context of Disease of the Exocrine Pancreas  
Posttransplantation Diabetes Mellitus  
Monogenic Diabetes Syndromes  
Gestational Diabetes Mellitus
- S50 3. Prevention or Delay of Diabetes and Associated Comorbidities**  
Lifestyle Behavior Change for Type 2 Diabetes  
Prevention  
Pharmacologic Interventions to Delay Type 2 Diabetes  
Prevention of Vascular Disease and Mortality  
Person-Centered Care Goals  
Prevention or Delay of Symptomatic Type 1 Diabetes
- S59 4. Comprehensive Medical Evaluation and Assessment of Comorbidities**  
Person-Centered Collaborative Care  
Comprehensive Medical Evaluation  
Immunizations  
Assessment of Comorbidities
- S86 5. Facilitating Positive Health Behaviors and Well-being to Improve Health Outcomes**  
Diabetes Self-management Education and Support  
Medical Nutrition Therapy  
Physical Activity  
Smoking Cessation: Tobacco, E-cigarettes,  
and Cannabis  
Supporting Positive Health Behaviors  
Psychosocial Care
- S128 6. Glycemic Goals and Hypoglycemia**  
Assessment of Glycemic Status  
Glycemic Goals  
Hypoglycemia Assessment, Prevention,  
and Treatment  
Intercurrent Illness  
Hyperglycemic Crises: Diagnosis, Management,  
and Prevention
- S146 7. Diabetes Technology**  
General Device Principles  
Blood Glucose Monitoring  
Continuous Glucose Monitoring Devices  
Insulin Delivery
- S167 8. Obesity and Weight Management for the Prevention and Treatment of Type 2 Diabetes**  
Assessment and Monitoring of the Individual With  
Overweight or Obesity  
Nutrition, Physical Activity, and Behavioral Therapy  
Pharmacotherapy  
Medical Devices for Weight Loss  
Metabolic Surgery
- S181 9. Pharmacologic Approaches to Glycemic Treatment**  
Pharmacologic Therapy for Adults With Type 1 Diabetes  
Surgical Treatment of Type 1 Diabetes  
Pharmacologic Therapy for Adults With Type 2 Diabetes  
Additional Recommendations for All Individuals  
With Diabetes  
Special Circumstances and Populations
- S207 10. Cardiovascular Disease and Risk Management**  
Hypertension and Blood Pressure Management  
Lipid Management  
Statin Treatment  
Antiplatelet Agents  
Cardiovascular Disease
- S239 11. Chronic Kidney Disease and Risk Management**  
Chronic Kidney Disease  
Epidemiology of Diabetes and Chronic Kidney Disease  
Assessment of Albuminuria and Estimated Glomerular  
Filtration Rate  
Diagnosis of Chronic Kidney Disease in People With  
Diabetes  
Staging of Chronic Kidney Disease  
Acute Kidney Injury  
Surveillance  
Interventions  
Referral to a Nephrologist
- S252 12. Retinopathy, Neuropathy, and Foot Care**  
Diabetic Retinopathy  
Neuropathy  
Foot Care
- S266 13. Older Adults**  
Neurocognitive Function  
Hypoglycemia  
Treatment Goals  
Lifestyle Management  
Pharmacologic Therapy  
Special Considerations for Older Adults With Type 1  
Diabetes  
Treatment in Post-Acute and Long-Term  
Care Settings  
End-of-Life Care

This issue is freely accessible online at [https://diabetesjournals.org/care/issue/48/Supplement\\_1](https://diabetesjournals.org/care/issue/48/Supplement_1).

Keep up with the latest information for *Diabetes Care* and other ADA titles via Facebook (/ADAPublications) and X (@ADA\_Pubs and @DiabetesCareADA).

---

**S283 14. Children and Adolescents**

Type 1 Diabetes  
Type 2 Diabetes  
Substance Use in Pediatric Diabetes  
Transition From Pediatric to Adult Care

**S306 15. Management of Diabetes in Pregnancy**

Diabetes in Pregnancy  
Glycemic Goals in Pregnancy  
Management of Diabetes in Pregnancy  
Preeclampsia and Aspirin  
Pregnancy and Drug Considerations  
Postpartum Care

**S321 16. Diabetes Care in the Hospital**

Hospital Care Delivery Standards  
Glycemic Goals in Hospitalized Adults  
Glucose Monitoring  
Glucose-Lowering Treatment in Hospitalized Individuals  
Hypoglycemia  
Medical Nutrition Therapy in the Hospital  
Self-management in the Hospital  
Standards for Special Situations  
Transition From the Hospital to the Ambulatory Setting  
Preventing Admissions and Readmissions  
The Future

**S335 17. Diabetes Advocacy**

Advocacy Statements

**S337 Disclosures**

**S344 Index**

---
